# Supplementary material
Source: Elsevier journal article supplement (https://www.sciencedirect.com/science/article/pii/S1578219016303626)
Supplement: mmc1 [file S1578219016303626:mmc1.doc]

Expert Panel Members

Acabani Melhem, Sauleiman; Acebo Mariñas, Elvira; Agudo Garcia, Azahara; Aguilera Peiro, Paula; Alcaide Martin, Antonio Jose; Alcala Garcia, Rebeca; Alcalde Herrero, Victor Manuel; Alhamwi Sadden, Gassan; Almeida Martin, Pablo Julio; Alonso Gonzalez, Julio; Alvarez Abella, Alba; Alvarez Sanchez, Salome; Ballester Martinez, Maria Asuncion; Ballestero Diez, Marta; Barboza Guadagnini, Lorena Matilde; Barrutia Borgue, Anne; Bernabeu Wittel, Jose; Bielsa Marsol, Maria Isabel; Blanes Martinez, Maria Mar; Boixeda de Miguel, Juan Pablo; Bonfill Orti, Montserrat; Bordas Orpinell, Francisco Javier; Bou Camps, Dolores; Cabello Santos, Alvaro; Cabeza Martinez, Rita Maria; Campoy Sanchez, Antonio; Cantalejo Rodriguez, Carolina; Capella Hempel, Marta; Carranza Romero, Carmen; Castellanos Gonzalez, Maria; Conejero Del Mazo, Claudia; Conejero Del Mazo, Raquel; De Daniel Rodriguez, Cristina; De Galvez Aranda, Maria Victoria; De la Fuente Meira, Sonia; De la Maza Argemi, Ildefonso; De Mena Obiols, Esperanza; Del Pozo Losada, Jesus; Del Rio de la Torre, Emilio; Dominguez Cruz, Javier Jesus; Dryk, Karina; Eguren Michelena, Cristina; Escudero Gomez-Pardo, Alberto; Feltes Guzman, Federico German; Fernandez Torres, Rosa Maria; Fernandez-Tresguerres Centeno, Ana Carolina; Ferrandiz Roig, Maria Victoria; Figueras Nart, Ignasi; Galvany Rossell, Loida; Garcia Fernandez, Laura; Garcia Fraile, Enrique; Garcia Montero, Pablo; Garcia Muret, Maria Pilar; Garcias Ladaria, Juan Gabriel; Godoy Diaz, Daniel Jesus; Godoy Trapero, Almudena; Gomez Armayones, Sara; Gomez Fernandez, Cristina; Gonzalez Llavona, Beatriz; Gonzalez Martin, Alberto; Gonzalez Quesada, Alicia Lourdes; Gonzalez Ruperez, Jesus; Guijarro Llorca, Jaime; Hajnal, Adrienn Eva; Hermosa Zarza, Eva Maria; Hernandez Jurado, Maria Isabel; Hernandez Ruiz, Eugenia; Herranz Pinto, Pedro; Hoffner Zuchelli, Mariana Viktoria; Hueso Gabriel, Luis; Izquierdo Herce, Noelia; Janer Torrens, Victor; Jimenez Gomez, Natalia; Knopfel Capelinha, Nicole; Lamas Domenech, Nuria; Liuti, Federica; Llamas Velasco, Maria Mar; Lopez Estebaranz, Jose Luis; Lopez Ferrer, Anna; Lopez Lopez, Rocio; Lopez Martin-Prieto, Sara; Lopez Nuñez, Maria; Lorente Lavirgen, Ana Isabel; Manubens Mercade, Elena; Mari Ruiz, Juan Ignacio; Marin Cabañas, Irene Maria; Martel Martel, Rosa Maria; Martinez Cuevas, Paula; Martinez Molina, Laura; Mas Ferra, Antoni; Maseda Pedrero, Rocio; Mir Bonafe, Jose Maria; Mir Bonafe, Juan Francisco; Montis Palos, Concepcion; Moragon Gordon, Manuel; Morales Gordillo, Victoriano; Morales Munera, Caridad Elena; Morell Franco, Laia; Moreno Martinez, Maria Pilar; Morillo Andujar de la Oliva, Mercedes; Mosquera Paz, Oscar; Muniesa Montserrat, Cristina; Nadal Llado, Cristina; Navajas Pinedo, Belen; Navarra Amayuelas, Esperanza; Navarra Amayuelas, Ramon; Noguera Morel, Lucero; Nogues Antich, Maria Elena; Notario Rosa, Jaume; Olivella Garces, Maria Rosa; Pastor Tomas, Natalia; Pedraz Muñoz, Javier; Peña Penabad, Maria Carmen; Perez Gil, Amalia; Perez Sanchez, Jose Maria Javier; Perez Vega, Elisa; Pestoni Porven, Carmela; Petiti, Gisela Hebe; Pigem Gasos, Ramon; Planas Ciudad, Sergi; Pulgar Martin, Fernando; Quintana Perez, Jorge Luis; Ramirez Santos, Aquilina; Ravella Mateu, Ana; Rodrigues Barata, Ana Rita; Rodriguez Bandera, Ana Isabel; Rodriguez Gerpe, Maria Victoria; Rodriguez Lozano, Jesus Manuel; Rodriguez Salido, Maria Jose; Roe Crespo, Esther; Rovira Lopez, Roger; Ruiz Salas, Veronica; Sanchez Martinez, Miguel Angel; Sanchez-Mora Trujillo, Rafael; Santana Molina, Nestor; Santiago Sanchez-Mateos, Diana Inmaculada; Seoane Pose, Maria Jose; Serra Baldrich, Esther; Servera Llaneras, Miguel; Servitje Bedate, Octavio; Sevila Llinares, Amparo; Simonsen, Sara Bjerg; Smandia Dominguez, Juan Antonio; Soguero Garcia, Maria Luisa; Solano-Lopez Morel, Guillermo Enrique; Soriano Hernandez, Maria Isabel; Soro Martinez, Pilar; Sotomayor Lopez, Elena; Terencio Alemany, Carmen; Toro Montecinos, Miguel Angel; Torrelo Fernandez, Antonio; Turrion Merino, Lucia; Urech Garcia de la Vega, Marta; Valenti Medina, Francesc; Vargas Laguna, Elena; Vasquez Chinchay, Fiorella; Vazquez Veiga, Hugo Alberto; Velasco Pastor, Antonio Manuel; Vicente Villa, Maria Asuncion; Vidal Sarro, David; Vilarrasa Rull, Eva; Villar Buil, Maria
